# Supplementary material for: Inhibitory effect of rBCG containing the fusion gene BFNA on EBV-positive tumours
Source: Research Square preprint supplement (doi:10.21203/rs.3.rs-4730535/v1), 2024-08-19
Supplement: Supplementary file 1 [file 4a123e012d47cc73cb6d57fd.pdf]

# ARRIVE

| ARRIVE                           |                                                                                                                                                                                                                                                                                                                                                                                                                                                                                                                                                                                                                                                                 |                                                                                                                           |                                                                  |
|----------------------------------|-----------------------------------------------------------------------------------------------------------------------------------------------------------------------------------------------------------------------------------------------------------------------------------------------------------------------------------------------------------------------------------------------------------------------------------------------------------------------------------------------------------------------------------------------------------------------------------------------------------------------------------------------------------------|---------------------------------------------------------------------------------------------------------------------------|------------------------------------------------------------------|
| Title                            | Inhibitory effect of rBCG containing the fusion gene BFNA on EBV-positive tumours                                                                                                                                                                                                                                                                                                                                                                                                                                                                                                                                                                               |                                                                                                                           |                                                                  |
| Study design                     | Group                                                                                                                                                                                                                                                                                                                                                                                                                                                                                                                                                                                                                                                           | Experimental Group                                                                                                        | Control Group                                                    |
|                                  | Group Setting                                                                                                                                                                                                                                                                                                                                                                                                                                                                                                                                                                                                                                                   | Epstein-Barr virus positive tumor-bearing mice injected with BCG, BCG-EBNA1, BCG-BZLF1, pMV-BFNA-rBCG                     | Epstein-Barr virus positive tumor-bearing mice injected with PBS |
|                                  | Experiment Unit                                                                                                                                                                                                                                                                                                                                                                                                                                                                                                                                                                                                                                                 | a cage of 6 mice                                                                                                          |                                                                  |
| Sample size                      | 30 6-week-old female mice in total                                                                                                                                                                                                                                                                                                                                                                                                                                                                                                                                                                                                                              | 24 6-week-old female mice randomly divided into 4 groups, with 6 mice in each group                                       | 6 6-week-old female mice in one group                            |
|                                  | How to Decide                                                                                                                                                                                                                                                                                                                                                                                                                                                                                                                                                                                                                                                   | While protecting animals and complied ethical needs, strive to obtain reproducible and valuable data as much as possible. |                                                                  |
| Inclusion and Exclusion Criteria | a. healthy female mice; b. aged 6 weeks; c. weigh 19-20g; d. 9 days of tumor vaccination; e. tumor size was basically the same.                                                                                                                                                                                                                                                                                                                                                                                                                                                                                                                                 |                                                                                                                           |                                                                  |
| Randomization                    | a. The physiological states of all mice were similar, and the cages were randomly placed before animal numbering. The placement of the cages and numbering of mice were different.<br>b. The experimental group and the control group were randomized into groups according to a completely randomized design. We numbered 30 mice one by one and used a random number table to group them. Randomly group are as follows:                                                                                                                                                                                                                                      |                                                                                                                           |                                                                  |
|                                  | Randomized Group                                                                                                                                                                                                                                                                                                                                                                                                                                                                                                                                                                                                                                                | Experimental Group                                                                                                        | Control Group                                                    |
|                                  |                                                                                                                                                                                                                                                                                                                                                                                                                                                                                                                                                                                                                                                                 | Group A: 5 6 11 19 21 27<br>Group B: 1 4 10 13 28 29<br>Group C: 7 8 15 20 25 26<br>Group D: 3 9 12 16 18 23              | 2 14 17 22 24 30                                                 |
| Blinding or Masking              | Shuyang Shao placed the cages; Shuo Huang numbered the mice; Shuyang Shao, Shuo Huang, Junying Wang, Liding Fan and Furen Meng performed the experiment; Yuanhui Wang integrated the data; Qingjie Xue and Li Zhang evaluated the outcome.                                                                                                                                                                                                                                                                                                                                                                                                                      |                                                                                                                           |                                                                  |
| Outcome Measures                 | The effect of recombinant BCG on the survival time of the tumor-bearing mice was observed, and the necrosis and apoptosis of the tumor cells were detected by Flow cytometry staining. The specific CTL killing effect of rBCG was detected by CCK-8 method, and the inhibitory and preventive effects of rBCG on transplanted tumor in nude mice were observed In vivo optical imaging system analysis detection: non-radioactive labeled fusion protein was used to observe and quantify the anti-tumor effect and various biological processes in vivo. The survival time, tumor formation time, tumor volume and weight of mice were measured and recorded. |                                                                                                                           |                                                                  |
| Statistical Methods              | The tumorigenesis time, tumor volume and weight of the mice are expressed as the mean ± standard deviation (x ±s), and SPSS 19.0 was used to process and analyze the measurement data. The tumorigenesis time data of mice were examined by the log-rank test. The number of independent samples was compared by single-factor analysis of variance (ANOVA), the volume of tumors in mice was compared by repeated-measures ANOVA, and the cytotoxicity to spleen cells in mice was compared by ANOVA using a factorial design. P≤0.05 was considered to indicate statistical significance.                                                                     |                                                                                                                           |                                                                  |
| Experimental Animals             | Source of animal: SPF<br>Species of strain: C57BL/6<br>Specification: 6 weeks<br>Number: 30 female mice<br>Weight: 19-20g                                                                                                                                                                                                                                                                                                                                                                                                                                                                                                                                       |                                                                                                                           |                                                                  |
| Experimental                     | Entering Date: May                                                                                                                                                                                                                                                                                                                                                                                                                                                                                                                                                                                                                                              | Application Date: Jan. 01, 2020                                                                                           | Ending Date: Dec. 01, 2024                                       |

|                   |                                                                                                                                                                                                                                                                                                                                                                                                                                                                                                                                                                                                                                                                                                                                                                                                                                                                                                                                                                                                                                                                                                                                                                                                                                                                     |  |  |
|-------------------|---------------------------------------------------------------------------------------------------------------------------------------------------------------------------------------------------------------------------------------------------------------------------------------------------------------------------------------------------------------------------------------------------------------------------------------------------------------------------------------------------------------------------------------------------------------------------------------------------------------------------------------------------------------------------------------------------------------------------------------------------------------------------------------------------------------------------------------------------------------------------------------------------------------------------------------------------------------------------------------------------------------------------------------------------------------------------------------------------------------------------------------------------------------------------------------------------------------------------------------------------------------------|--|--|
| <b>Procedures</b> | 06, 2020                                                                                                                                                                                                                                                                                                                                                                                                                                                                                                                                                                                                                                                                                                                                                                                                                                                                                                                                                                                                                                                                                                                                                                                                                                                            |  |  |
|                   | <p>We obtained BZLF1 and EBNA1 cDNA, and overlapped jointly to assemble the fusion gene BFNA. Then pMV-BFNA was transformed into BCG-competent cells after inserting BFNA into pMV38. With western blotting to detect the target fusion protein, specific antibodies were detected in serum by ELISAs and spleen cell-specific cytokines were detected by ELISPOT. The experimental group was injected with equivalent dose of BCG, BCG-EBNA1, BCG-BZLF1, pMV-BFNA-rBCG ; and the control group was injected with equivalent dose of PBS. CTL activity, tumor weight, tumor formation time and mouse survival were analyzed in EBV-positive tumor cell (NPRC18) cancer models, and flow cytometry was performed to analyze the quantities of CD8<sup>+</sup> and CD4<sup>+</sup> T cells in C57BL/6J mice. Single-factor analysis of variance was performed with SPSS 19.0 to evaluate rBCG inhibition.</p> <p>Execution method: euthanasia (We followed the method of rodent execution that was more common in the international community: the experimental animals were simultaneously placed in a sealed box container, then the box was slowly filled with CO<sub>2</sub>, and the animals died within 1 to 3 min in the CO<sub>2</sub>-filled container.)</p> |  |  |
| <b>Results</b>    | <p>The molecular weight of the fusion protein was approximately 55.5 kD. The titer of antibody in the rBCG group was highly significant (<math>P \leq 0.01</math>) and prolonged that tumorigenesis time, the specific killing ability targeting the recombinant target protein was increased. The rBCG group with the BFNA fusion gene demonstrated a better effect on tumors than BCG-EBNA1 and BCG-BZLF1 groups. Based on flow cytometry analysis, the numbers of CD4<sup>+</sup> T and CD8<sup>+</sup> T cells in the blood of the rBCG group were significantly higher than the control group (<math>P &lt; 0.01</math>). The mice injected with rBCG had more obvious lymphocyte infiltration in the tumor area.</p>                                                                                                                                                                                                                                                                                                                                                                                                                                                                                                                                          |  |  |
